# Supplementary material for: Circadian alignment of food intake and glycaemic control by time-restricted eating: A systematic review and meta-analysis
Source: Springer Nature journal article supplement (doi:10.1007/s11154-023-09853-x), 2023-11-22
Supplement: MOESM1 [file 11154_2023_9853_MOESM1_ESM.pdf]

Reviews in Endocrine and Metabolic Disorders

**Circadian alignment of food intake and glycaemic control by time-restricted eating: a systematic review and meta-analysis**

Rovira-Llopis S <sup>1,2\*</sup>, Luna-Marco C <sup>2</sup>, Perea-Galera L <sup>2</sup>, Bañuls C <sup>2</sup>, Morillas C <sup>2</sup>, Victor VM <sup>1,2,3\*</sup>.

<sup>1</sup> Department of Physiology, School of Medicine, University of Valencia and Institute of Health Research INCLIVA, Valencia, Spain.

<sup>2</sup> Service of Endocrinology and Nutrition, University Hospital Doctor Peset, Foundation for the Promotion of Health and Biomedical Research in the Valencian Region (FISABIO), Valencia, Spain.

<sup>3</sup> CIBERehd - Department of Pharmacology, University of Valencia, Valencia, Spain; Foundation for the Promotion of Health and Biomedical Research in the Valencian Region (FISABIO), Valencia, Spain.

\* Correspondence: susana.rovira@uv.es; victor.victor@uv.es

Tel.: +34 963-188-867 (SRL); +34 961-625-739 (VMV) Fax: +34-961-622-492.

## PUMBED SEARCH

("time-restricted eating" OR "time-restricted feeding" OR  
"prolonged nightly fasting" OR "prolonged overnight fasting") AND  
("glycemic control" OR "HbA1c" OR "glucose" OR "diabetes")

## Embase

Session Results

.....  
No. Query  
Results Results Date  
  
#1. ('time-restricted eating' OR 'time-  
restricted 418 1 Jan 2023  
feeding'/exp OR 'time-restricted feeding' OR  
'prolonged nightly fasting' OR 'prolonged  
overnight fasting') AND ('glycemic control'/exp  
OR 'glycemic control' OR 'hbalc'/exp OR 'hbalc'  
OR 'glucose'/exp OR 'glucose' OR 'diabetes'/exp  
OR 'diabetes')  
.....

## Cochrane Library

Search Name:

Date Run: 01/01/2023 23:09:13

Comment:

| ID | Search                                                                                                                   | Hits   |
|----|--------------------------------------------------------------------------------------------------------------------------|--------|
| #1 | "time-restricted eating" OR "time-restricted feeding" OR<br>"prolonged nightly fasting" OR "prolonged overnight fasting" | 274    |
| #2 | "glycemic control" OR "HbA1c" OR "glucose" OR "diabetes"                                                                 | 137874 |
| #3 | {AND #1- #2}                                                                                                             | 157    |
